# Supplementary material for: A Pilot Study of A2NTX, a Novel Low-Molecular-Weight Neurotoxin Derived from Subtype A2 for Post-Stroke Lower Limb Spasticity: Comparison with OnabotulinumtoxinA
Source: MDPI journal article supplement (doi:10.3390/toxins14110739), 2022-10-28
Supplement: s1 [file s1]

# Supplementary Data: Fisher exact test for backgrounds (ITT vs FAS)

ITT

| Fisher exact test |                |    |    | Gender |  | A1^R | A1^L | A2^R | A2^L |         |
|-------------------|----------------|----|----|--------|--|------|------|------|------|---------|
| Male              |                |    |    | Female |  | 13   | 3    | 0    | 15   | 2.7E-06 |
| A1                | 15             | 1  | 16 |        |  | 12   | 4    | 1    | 14   | 0.00013 |
| A2                | 10             | 5  | 15 |        |  | 11   | 5    | 2    | 13   | 0.00222 |
|                   | 13             | 18 | 31 |        |  | 10   | 6    | 3    | 12   | 0.01767 |
|                   |                |    |    |        |  | 9    | 7    | 4    | 11   | 0.07571 |
| P0                | 0.00023        |    |    |        |  | 8    | 8    | 5    | 10   | 0.18738 |
| P                 | <b>0.00014</b> |    |    |        |  | 7    | 9    | 6    | 9    | 0.27761 |
|                   |                |    |    |        |  | 6    | 10   | 7    | 8    | 0.24985 |
|                   |                |    |    |        |  | 5    | 11   | 8    | 7    | 0.13628 |
|                   |                |    |    |        |  | 4    | 12   | 9    | 6    | 0.04416 |
|                   |                |    |    |        |  | 3    | 13   | 10   | 5    | 0.00815 |
|                   |                |    |    |        |  | 2    | 14   | 11   | 4    | 0.00079 |
|                   |                |    |    |        |  | 1    | 15   | 12   | 3    | 3.5E-05 |
|                   |                |    |    |        |  | 0    | 16   | 13   | 2    | 5.1E-07 |

| Fisher exact test |                |    |    | R vs L |  | A1^R | A1^L | A2^R | A2^L |         |
|-------------------|----------------|----|----|--------|--|------|------|------|------|---------|
| R                 |                |    |    | L      |  | 13   | 3    | 0    | 15   | 2.7E-06 |
| A1                | 5              | 11 | 16 |        |  | 12   | 4    | 1    | 14   | 0.00013 |
| A2                | 8              | 7  | 15 |        |  | 11   | 5    | 2    | 13   | 0.00222 |
|                   | 13             | 18 | 31 |        |  | 10   | 6    | 3    | 12   | 0.01767 |
|                   |                |    |    |        |  | 9    | 7    | 4    | 11   | 0.07571 |
| P0                | 0.13628        |    |    |        |  | 8    | 8    | 5    | 10   | 0.18738 |
| P                 | <b>0.23202</b> |    |    |        |  | 7    | 9    | 6    | 9    | 0.27761 |
|                   |                |    |    |        |  | 6    | 10   | 7    | 8    | 0.24985 |
|                   |                |    |    |        |  | 5    | 11   | 8    | 7    | 0.13628 |
|                   |                |    |    |        |  | 4    | 12   | 9    | 6    | 0.04416 |
|                   |                |    |    |        |  | 3    | 13   | 10   | 5    | 0.00815 |
|                   |                |    |    |        |  | 2    | 14   | 11   | 4    | 0.00079 |
|                   |                |    |    |        |  | 1    | 15   | 12   | 3    | 3.5E-05 |
|                   |                |    |    |        |  | 0    | 16   | 13   | 2    | 5.1E-07 |

| Fisher exact test |                |    |    | Cause   |  | A1^R | A1^L | A2^R | A2^L |         |
|-------------------|----------------|----|----|---------|--|------|------|------|------|---------|
| Bleed             |                |    |    | Infarct |  | 13   | 3    | 0    | 15   | 2.7E-06 |
| A1                | 12             | 4  | 16 |         |  | 12   | 4    | 1    | 14   | 0.00013 |
| A2                | 9              | 6  | 15 |         |  | 11   | 5    | 2    | 13   | 0.00222 |
|                   | 13             | 18 | 31 |         |  | 10   | 6    | 3    | 12   | 0.01767 |
|                   |                |    |    |         |  | 9    | 7    | 4    | 11   | 0.07571 |
| P0                | 0.04416        |    |    |         |  | 8    | 8    | 5    | 10   | 0.18738 |
| P                 | <b>0.02002</b> |    |    |         |  | 7    | 9    | 6    | 9    | 0.27761 |
|                   |                |    |    |         |  | 6    | 10   | 7    | 8    | 0.24985 |
|                   |                |    |    |         |  | 5    | 11   | 8    | 7    | 0.13628 |
|                   |                |    |    |         |  | 4    | 12   | 9    | 6    | 0.04416 |
|                   |                |    |    |         |  | 3    | 13   | 10   | 5    | 0.00815 |
|                   |                |    |    |         |  | 2    | 14   | 11   | 4    | 0.00079 |
|                   |                |    |    |         |  | 1    | 15   | 12   | 3    | 3.5E-05 |
|                   |                |    |    |         |  | 0    | 16   | 13   | 2    | 5.1E-07 |

FAS

| Fisher exact test |                |   |    | Gender |  | A1^R | A1^L | A2^R | A2^L |         |
|-------------------|----------------|---|----|--------|--|------|------|------|------|---------|
| Male              |                |   |    | Female |  | 12   | 1    | 0    | 11   | 0.00122 |
| A1                | 12             | 1 | 13 |        |  | 11   | 2    | 1    | 10   | 0.08075 |
| A2                | 8              | 3 | 11 |        |  | 10   | 3    | 2    | 9    | 1.48033 |
|                   | 20             | 4 | 24 |        |  | 9    | 4    | 3    | 8    | 11.1025 |
|                   |                |   |    |        |  | 8    | 5    | 4    | 7    | 39.9689 |
| P0                | 0.20186        |   |    |        |  | 7    | 6    | 5    | 6    | 74.6087 |
| P                 | <b>0.08197</b> |   |    |        |  | 6    | 7    | 6    | 5    | 74.6087 |
|                   |                |   |    |        |  | 5    | 8    | 7    | 4    | 39.9689 |
|                   |                |   |    |        |  | 4    | 9    | 8    | 3    | 11.1025 |
|                   |                |   |    |        |  | 3    | 10   | 9    | 2    | 1.48033 |
|                   |                |   |    |        |  | 2    | 11   | 10   | 1    | 0.08075 |
|                   |                |   |    |        |  | 1    | 12   | 11   | 0    | 0.00122 |

| Fisher exact test |                |    |    | R vs L |  | A1^R | A1^L | A2^R | A2^L |         |
|-------------------|----------------|----|----|--------|--|------|------|------|------|---------|
| R                 |                |    |    | L      |  | 12   | 1    | 0    | 11   | 5.2E-06 |
| A1                | 5              | 8  | 13 |        |  | 11   | 2    | 1    | 10   | 0.00034 |
| A2                | 8              | 3  | 11 |        |  | 10   | 3    | 2    | 9    | 0.0063  |
|                   | 13             | 11 | 24 |        |  | 9    | 4    | 3    | 8    | 0.04726 |
|                   |                |    |    |        |  | 8    | 5    | 4    | 7    | 0.17015 |
| P0                | 0.08507        |    |    |        |  | 7    | 6    | 5    | 6    | 0.31761 |
| P                 | <b>0.05391</b> |    |    |        |  | 6    | 7    | 6    | 5    | 0.31761 |
|                   |                |    |    |        |  | 5    | 8    | 7    | 4    | 0.17015 |
|                   |                |    |    |        |  | 4    | 9    | 8    | 3    | 0.04726 |
|                   |                |    |    |        |  | 3    | 10   | 9    | 2    | 0.0063  |
|                   |                |    |    |        |  | 2    | 11   | 10   | 1    | 0.00034 |
|                   |                |    |    |        |  | 1    | 12   | 11   | 0    | 5.2E-06 |

| Fisher exact test |                |   |    | Cause   |  | A1^R | A1^L | A2^R | A2^L |         |
|-------------------|----------------|---|----|---------|--|------|------|------|------|---------|
| Bleed             |                |   |    | Infarct |  | 12   | 1    | 0    | 11   | 9.7E-05 |
| A1                | 10             | 3 | 13 |         |  | 11   | 2    | 1    | 10   | 0.00637 |
| A2                | 8              | 3 | 11 |         |  | 10   | 3    | 2    | 9    | 0.11687 |
|                   | 18             | 6 | 24 |         |  | 9    | 4    | 3    | 8    | 0.87651 |
|                   |                |   |    |         |  | 8    | 5    | 4    | 7    | 3.15544 |
| P0                | 0.3506         |   |    |         |  | 7    | 6    | 5    | 6    | 5.89016 |
| P                 | <b>0.12334</b> |   |    |         |  | 6    | 7    | 6    | 5    | 5.89016 |
|                   |                |   |    |         |  | 5    | 8    | 7    | 4    | 3.15544 |
|                   |                |   |    |         |  | 4    | 9    | 8    | 3    | 0.87651 |
|                   |                |   |    |         |  | 3    | 10   | 9    | 2    | 0.11687 |
|                   |                |   |    |         |  | 2    | 11   | 10   | 1    | 0.00637 |
|                   |                |   |    |         |  | 1    | 12   | 11   | 0    | 9.7E-05 |
